# Supplementary material for: The Patient’s Point of View: COVID-19 and Neuroendocrine Tumor Disease
Source: MDPI journal article supplement (doi:10.3390/cancers14030613), 2022-01-26
Supplement: s1 [file s1]

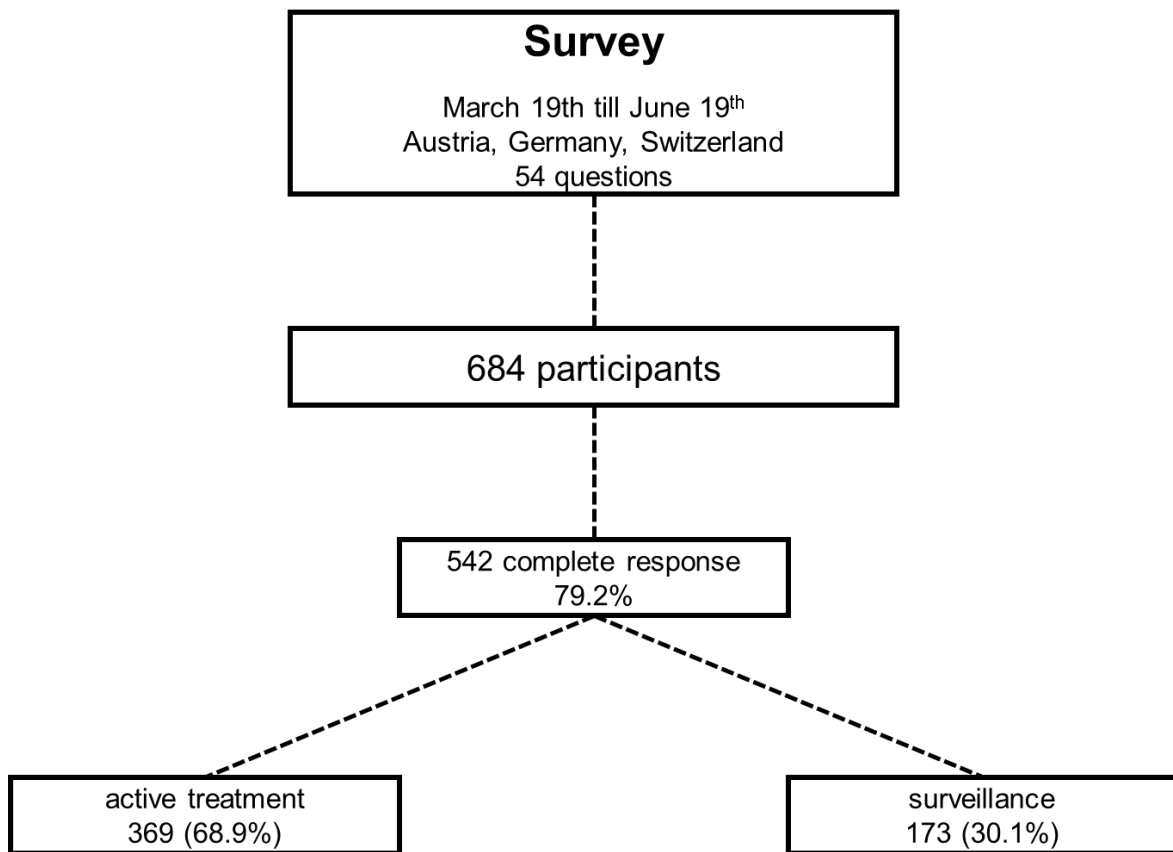

**Figure S1.** Flow chart of the survey.

**Table S1.** Complete questionnaire.

|     |                                                                                                                                                                                                                            |
|-----|----------------------------------------------------------------------------------------------------------------------------------------------------------------------------------------------------------------------------|
| A1  | In which country are you treated?                                                                                                                                                                                          |
| A2  | Are you single, married, widowed or divorced?                                                                                                                                                                              |
| A3  | How old are you?                                                                                                                                                                                                           |
| A4  | Which NET disease did you or do you have?                                                                                                                                                                                  |
| A5  | Is your disease hormone-active?                                                                                                                                                                                            |
| A6  | Which hormone syndrome do you have?                                                                                                                                                                                        |
| A7  | How long has your disease been known?                                                                                                                                                                                      |
| A8  | How long was the time period between symptoms and diagnosis?                                                                                                                                                               |
| A9  | Does the disease cause you any complaints?                                                                                                                                                                                 |
| A10 | What are the complaints?                                                                                                                                                                                                   |
| A11 | Are you unable to work as a result of the disease?                                                                                                                                                                         |
| A12 | Have you been unable to go to work because of your disease IN THE LAST 3 MONTHS?                                                                                                                                           |
| A13 | In which facility are you treated or are you in surveillance?                                                                                                                                                              |
| A14 | Are you undergoing oncological follow-up or active treatment?                                                                                                                                                              |
| A15 | Which treatment are you currently receiving?                                                                                                                                                                               |
| A16 | Are you suffering from side effects of your current therapy?                                                                                                                                                               |
| A17 | Which kind of side effects are present?                                                                                                                                                                                    |
| A18 | Are you satisfied with the following points: medical treatment/therapy, organization and medical care                                                                                                                      |
| A19 | Do you have any comorbidities?                                                                                                                                                                                             |
|     |                                                                                                                                                                                                                            |
| S1  | Are you worried about the Covid-19 pandemic?                                                                                                                                                                               |
| S2  | Has the Covid-19 pandemic affected your treatment or controls?                                                                                                                                                             |
| S3  | In which area have your appointments been delayed or even had to be cancelled? (outpatient and inpatient appointments)                                                                                                     |
| S3  | In which area have your appointments been delayed or even had to be cancelled? (imaging MRI/CT, PET/CT, PRRT, surgical procedures, supportive therapies, treatment such as chemotherapy and patient organization meetings) |
| S4  | Have you postponed/cancelled any treatments or follow-up appointments due to fear of Covid-19? (outpatient and inpatient appointments)                                                                                     |
| S5  | Are you worried about going to hospital or to your consultation for treatment because of COVID-19? (outpatient and inpatient appointments)                                                                                 |
| S6  | Have you used the option of telephone/video consultations?                                                                                                                                                                 |
| S7  | Have you talked to your NET specialist about your risk of severe COVID-19 disease?                                                                                                                                         |
| S8  | Has your physician recommended interventions to reduce your risk of acquiring COVID-19?                                                                                                                                    |
| S9  | Have you cancelled private or professional appointments (beyond the prescribed amount) to reduce the risk of acquiring Covid-19?                                                                                           |
| S10 | Would you describe yourself as a risk group for severe Covid-19 disease?                                                                                                                                                   |
| S11 | Do you feel isolated with your disease due to the Covid 19 pandemic?                                                                                                                                                       |
| S12 | Do they have help with everyday shopping and general errands from family, friends and neighbours?                                                                                                                          |

|     |                                                                                                                                                                                                                                                                                                             |
|-----|-------------------------------------------------------------------------------------------------------------------------------------------------------------------------------------------------------------------------------------------------------------------------------------------------------------|
| S13 | Have you used support from a self-help group so far?                                                                                                                                                                                                                                                        |
| S14 | Have you contacted a self-help group because of the Covid-19 pandemic?                                                                                                                                                                                                                                      |
| S15 | Have you searched/found specific information on the web about Covid-19 in relation to NET?                                                                                                                                                                                                                  |
| S16 | Has the Covid-19 situation deteriorated your NET treatment?                                                                                                                                                                                                                                                 |
| S17 | If no: Are you worried that the Covid-19 situation could lead to a deterioration of your NET care?                                                                                                                                                                                                          |
| S18 | What interventions would you like to see to improve care/treatment in the context of the Covid-19 pandemic?                                                                                                                                                                                                 |
| S19 | Has your treatment been modified as a result of the Covid-19 pandemic?                                                                                                                                                                                                                                      |
| S20 | Has your physician discussed with you the risk of severe Covid-19 disease during your current / intended therapy?                                                                                                                                                                                           |
| S21 | Is there a difference in the accessibility of your physician before and now during the pandemic?                                                                                                                                                                                                            |
| S22 | Have you refrained from using public transport to get to the physician/hospital for fear of getting infected with Covid-19?                                                                                                                                                                                 |
| S23 | Do you often wear an FFP2 mask, or always a "normal" mouth-nose protection (MNS)?                                                                                                                                                                                                                           |
| S24 | Have you been tested for Covid-19?                                                                                                                                                                                                                                                                          |
| S25 | Did you have a Covid-19 infection?                                                                                                                                                                                                                                                                          |
| S26 | What was the course of the disease?                                                                                                                                                                                                                                                                         |
| S27 | Have you suffered or are you currently suffering from any after-effects of Covid-19?                                                                                                                                                                                                                        |
| S28 | Did anyone in your social environment suffer from Covid-19?                                                                                                                                                                                                                                                 |
| S29 | Would you get vaccinated against Covid-19?                                                                                                                                                                                                                                                                  |
| S30 | Can you explain why you refuse vaccination?                                                                                                                                                                                                                                                                 |
| S31 | Have you had the flu vaccination at least once in the last 5 years?                                                                                                                                                                                                                                         |
| S32 | Do you suffer from a psychiatric comorbidity in addition to your NET disease? (e.g. depression, anxiety disorder, unstable emotional personality disorder)                                                                                                                                                  |
| S33 | If you answered 'yes' to the previous question: do you feel that the COVID-19 pandemic and its effects have had a negative impact on your psychological comorbidity?                                                                                                                                        |
| S34 | Please use the scale for the following statements.<br>Have you noticed an increase in the following symptoms since the start of the Covid-19 pandemic?<br>Lack of happiness, loss of interest, sad mood, reduced motivation. Did you suffer from insomnia?<br>Have you often felt socially isolated/lonely? |
| S35 | Has the Covid-19 pandemic affected your work situation?                                                                                                                                                                                                                                                     |
